# THE JOURNAL OF NEUROPSYCHIATRY and Clinical Neurosciences

The Official Journal of the American Neuropsychiatric Association

## In this issue:

- Limbic Metabolic Abnormalities in Remote Traumatic Brain Injury and Correlation With Psychiatric Morbidity and Social Functioning
- The Use of a Series of Ketamine Infusions in Two Patients With Treatment-Resistant Depression
- Social Anxiety in Patients With Parkinson's Disease
- Efficiency of Venlafaxine in Patients With Psychogenic Nonepileptic Seizures and Anxiety and/or Depressive Disorders

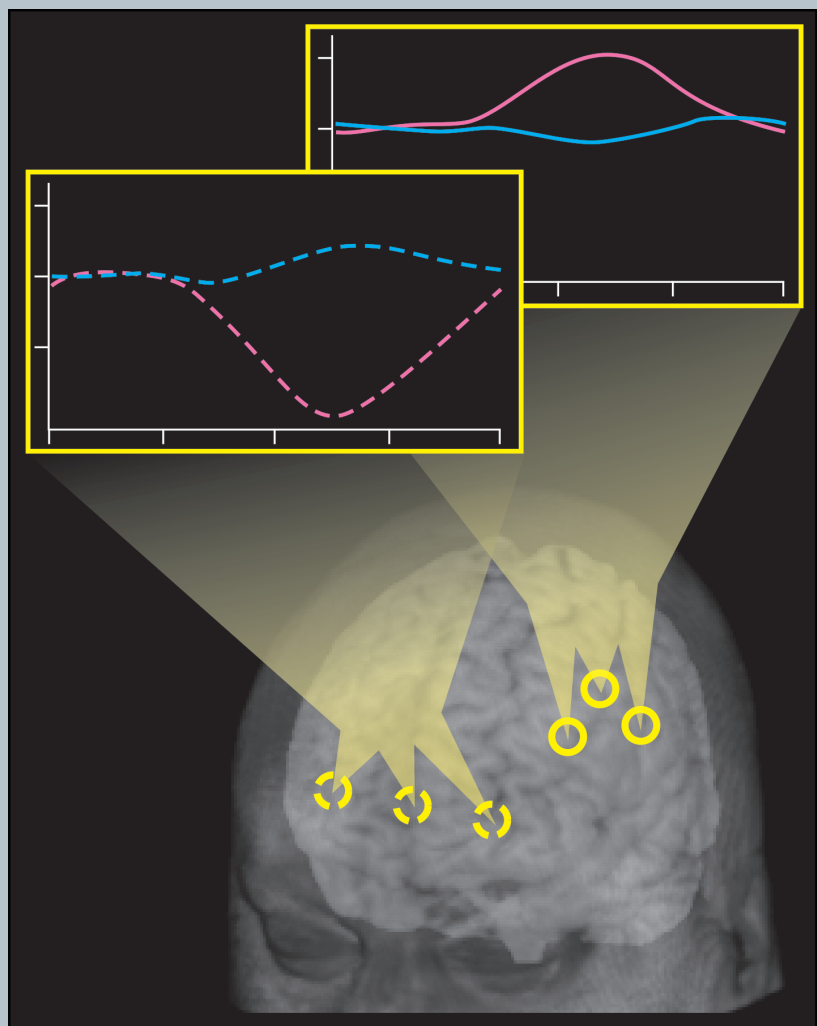

Source: https://psychiatryonline.org/doi/suppl/10.1176/jnp.2010.22.issue-4/suppl_file/cover.pdf
