# The NEW [www.appi.org](http://www.appi.org) makes its debut! visit today

## The new [www.appi.org](http://www.appi.org) offers:

- Special Discounts for American Psychiatric Association Members and Members-in-Training
- Detailed descriptions on more than 700 titles plus subscription products
- **My Account** history with order and tracking information
- Fast and easy navigation
- Enhanced search engine

The screenshot displays the homepage of the American Psychiatric Publishing, Inc. website. At the top, there is a navigation menu with links for 'Disorders', 'Subjects', 'Assessment & Treatment', 'Guides, References & Manuals', 'Books', 'Journals', and 'eContent'. A search bar is prominently featured with a 'Go' button and an 'Advanced Search' link. Below the search bar, there are several promotional sections: 'Featured Titles' featuring 'Long-Term Psychodynamic Psychotherapy' by Glen O. Gabbard, M.D., with a 'Paperback • \$65.00' price tag and an 'Add to Cart' button; 'Featured Author' for Glen O. Gabbard, M.D., with a portrait and a 'Learn More' link; 'Explore the DSM Library' with images of the 'DIAGNOSTIC AND STATISTICAL MANUAL OF MENTAL DISORDERS' and 'DSM-IV-TR' books; and 'Discover the Journals of American Psychiatric Publishing' featuring 'PSYCHIATRIC SERVICES' and 'FOCUS' journals. On the right side, there is a 'Resources' section with links for various user groups and a 'Search Books' section powered by Google. A 'Subscribe' section is also present, encouraging users to sign up for the APPI Newsletter. The footer contains copyright information and contact details for American Psychiatric Publishing, Inc.

**Special Discount for Members:**  
**15% Discount** for APA Members  
**30% Discount** for APA Members-in-Training

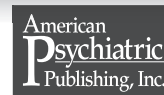

The First and Last Word in Psychiatry

American Psychiatric Publishing, Inc.  
[appi@psych.org](mailto:appi@psych.org) • 1-800-368-5777 • 703-907-7322
